# Supplementary material
Source: PubMed Central journal article supplement (PMC3870010)
Supplement: NIHMS535465-supplement-Supplementary_Data.pdf [file NIHMS535465-supplement-Supplementary_Data.pdf]

## Supporting Information

# Structure-Activity Relationships for Biodistribution, Pharmacokinetics and Excretion of Atomically Precise Nanoclusters in a Murine Model

O. Andrea Wong<sup>1</sup>, Ryan J. Hansen<sup>2</sup>, Thomas W. Ni<sup>1</sup>, Christine Heinecke<sup>1</sup>, W. Scott Compel<sup>1</sup>,  
Daniel L. Gustafson<sup>2</sup> and Christopher J. Ackerson<sup>1\*</sup>

1. Department of Chemistry, Colorado State University, Fort Collins, CO 80523

2. Department of Clinical Sciences, Colorado State University, Fort Collins, CO, 80523

Phone: 970-491-0521

Fax: 970-491-1801

Email: ackerson@mail.colostate.edu

## Table of Contents

|                                                                                                                                                             |       |
|-------------------------------------------------------------------------------------------------------------------------------------------------------------|-------|
| <b>Fig. S1:</b> Polyacrylamide gel of Au <sub>102</sub> (pMBA) <sub>44</sub>                                                                                | S2    |
| <b>Fig. S2:</b> Graph of relative amounts of compounds <b>1-3</b> in urine and feces                                                                        | S2    |
| <b>Fig. S3:</b> Graph of relative amounts of compounds <b>4,5</b> , and the Au <sub>102</sub> 1:1 exchange<br>compound in urine and feces                   | S3    |
| <b>Fig. S4-S7:</b> Atomistic models of Au <sub>25</sub> -based compounds                                                                                    | S3-S5 |
| <b>Fig. S8-S10:</b> Atomistic models of Au <sub>102</sub> -based compounds                                                                                  | S5-S6 |
| The chemical and biological properties of the compounds discussed in the main text are<br>calculated and predicted from the atomistic models in Fig. S4-S10 |       |
| <b>Fig. S11-S13:</b> Percent dosed in tissues of the Au <sub>25</sub> -based compounds                                                                      | S7-S8 |
| <b>Fig. S14-S15:</b> Percent dosed in tissues of the Au <sub>102</sub> -based compounds                                                                     | S8-S9 |
| <b>Fig. S16:</b> <sup>1</sup> H NMR of compound <b>5</b>                                                                                                    | S9    |
| <b>Table S1:</b> Information on Au <sub>102</sub> -based 1:1 ligand exchange compound                                                                       | S10   |
| <b>Fig. S17:</b> Blood drug concentration vs. time curves of Au <sub>102</sub> -based compounds                                                             | S10   |

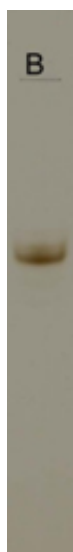

**Fig. S1** Polyacrylamide gel electrophoresis of  $\text{Au}_{102}(\text{pMBA})_{44}$  that shows the purity of the compound.

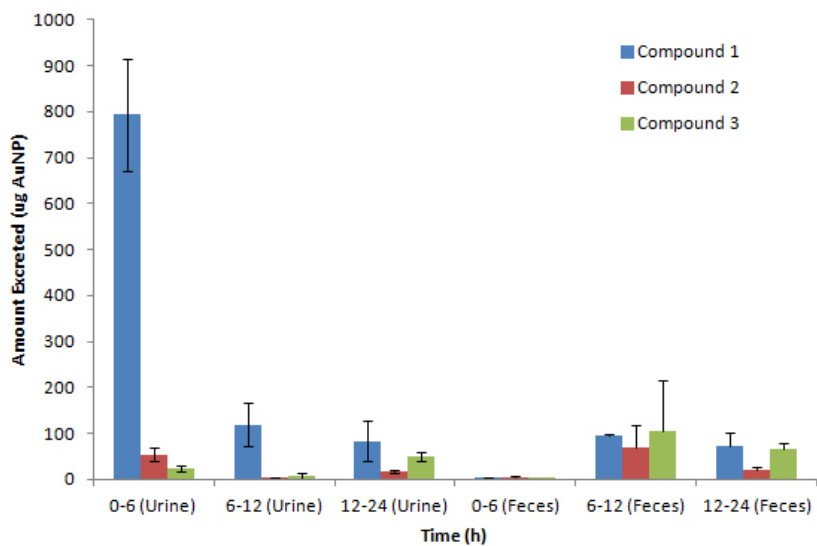

**Fig. S2** Relative amounts of compounds **1-3** in urine and feces at 6, 12, and 24 hours post injection time.

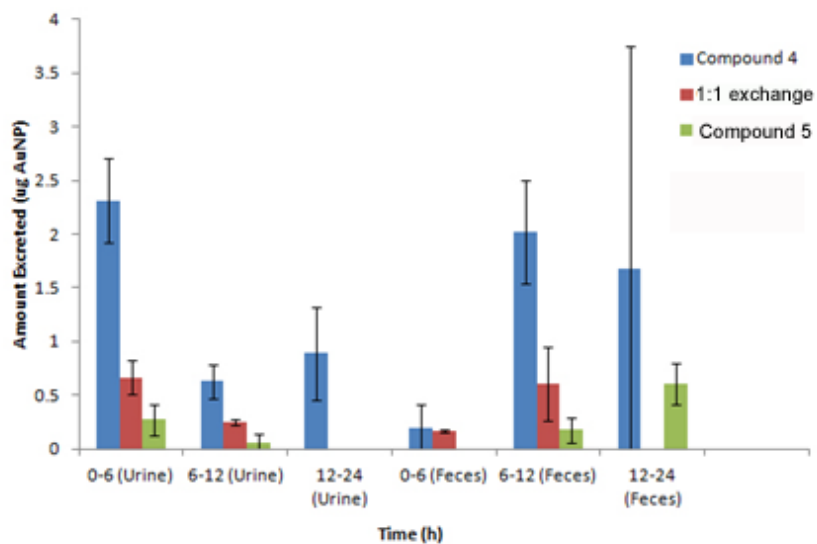

**Fig. S3** Relative amounts of compounds **4,5**, and the 1:1 exchange  $\text{Au}_{102}$ -based compound ( $\text{Au}_{102}\text{pMBA}_{44}$  exchanged with  $\text{HS}-(\text{CH}_2)_{11}\text{EG}_4\text{-OH}$ ) in urine and feces at 6, 12, and 24 hours post injection time.

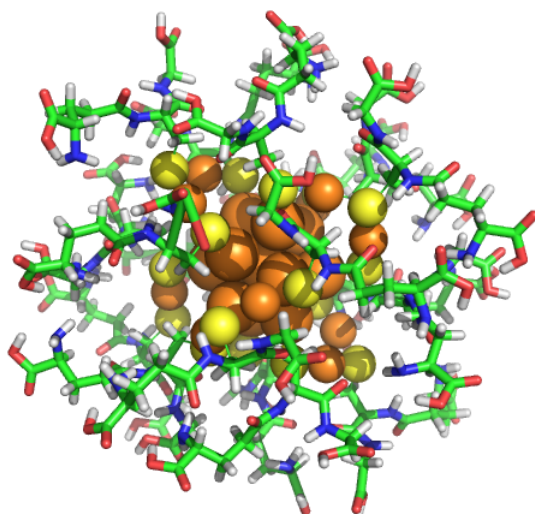

**Fig. S4**  $\text{Au}_{25}(\text{GSH})_{18}$ , Compound **1**

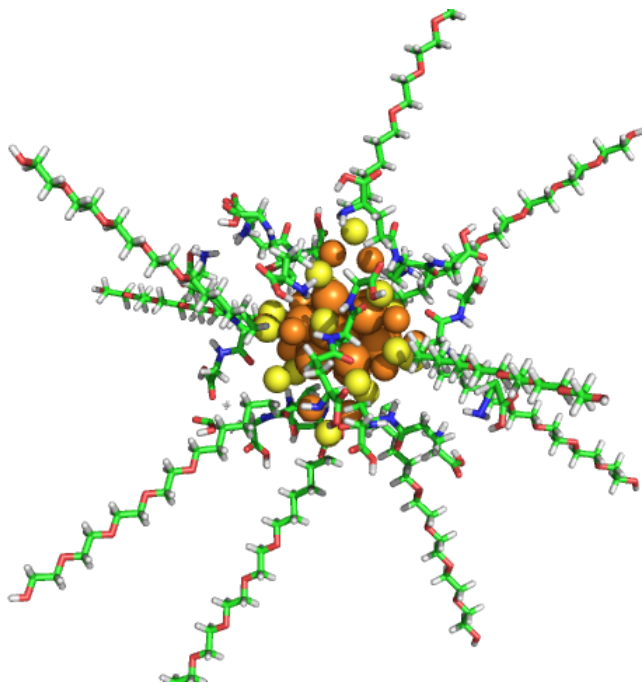

**Fig. S5**  $\text{Au}_{25}(\text{GSH})_9(\text{OEG})_9$ , (OEG =  $\text{HS}-(\text{CH}_2)_6\text{-EG-OH}$ ), Compound **2**

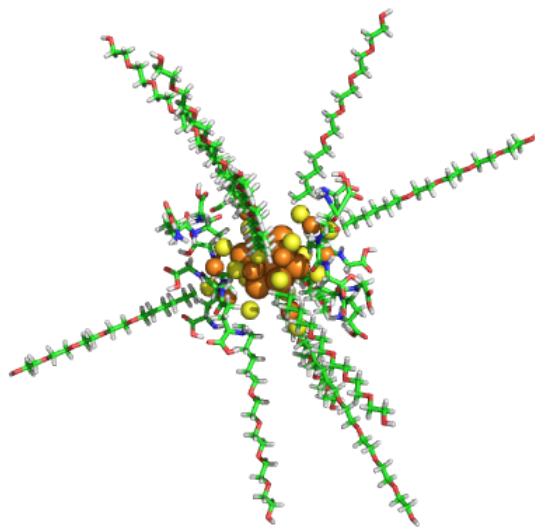

**Fig. S6**  $\text{Au}_{25}(\text{GSH})_6(\text{OEG})_{12}$ , (OEG =  $\text{HS}-(\text{CH}_2)_6\text{-EG-OH}$ ), Compound **3**

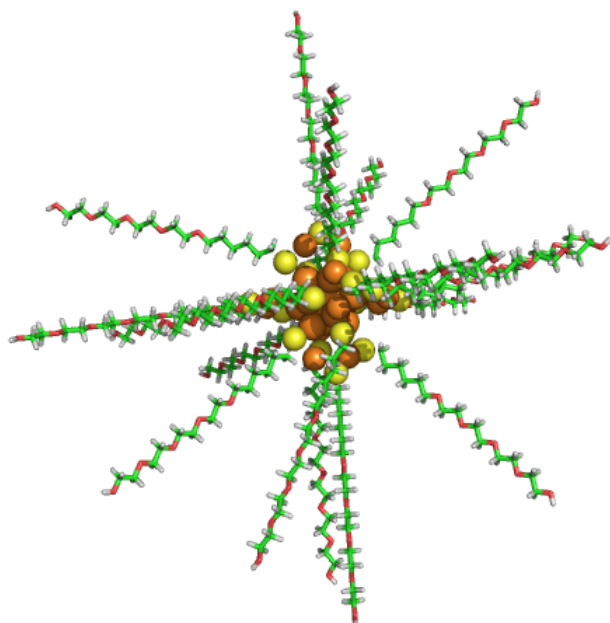

**Fig. S7** Au<sub>25</sub>(OEG)<sub>18</sub>, (OEG = HS-(CH<sub>2</sub>)<sub>6</sub>-EG-OH)

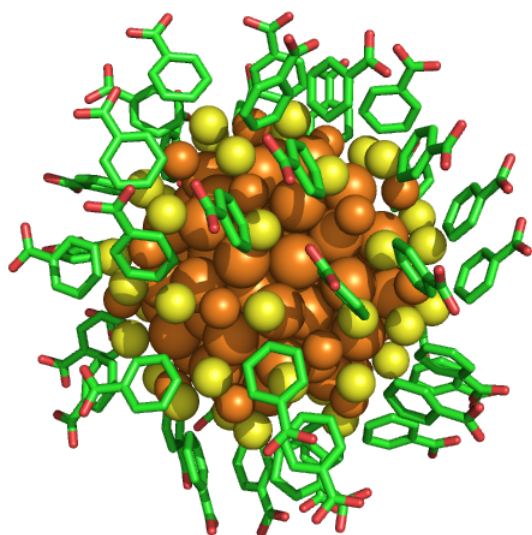

**Fig. S8** Au<sub>102</sub>(pMBA)<sub>44</sub>, Compound 4

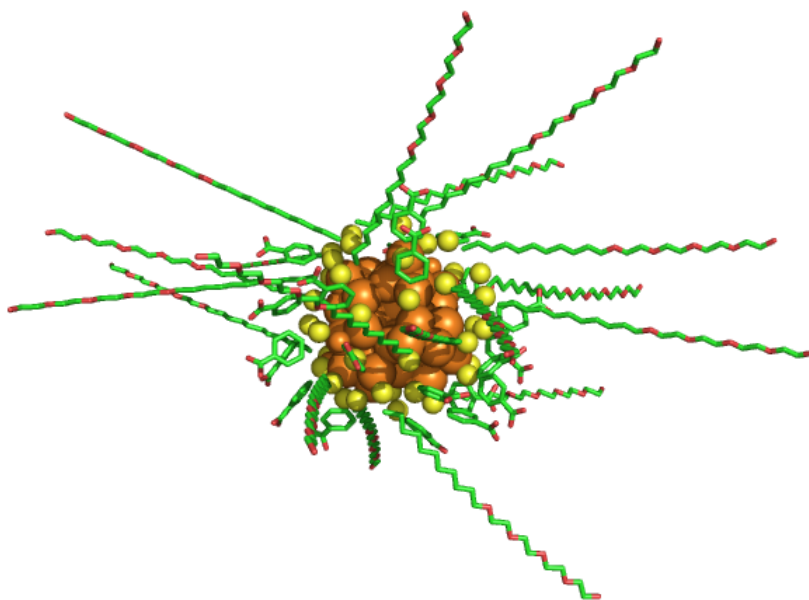

**Fig. S9**  $\text{Au}_{102}(\text{pMBA})_{25}(\text{OEG})_{19}$ , (OEG =  $\text{HS}-(\text{CH}_2)_{11}\text{-EG-OH}$ ), Compound **5**

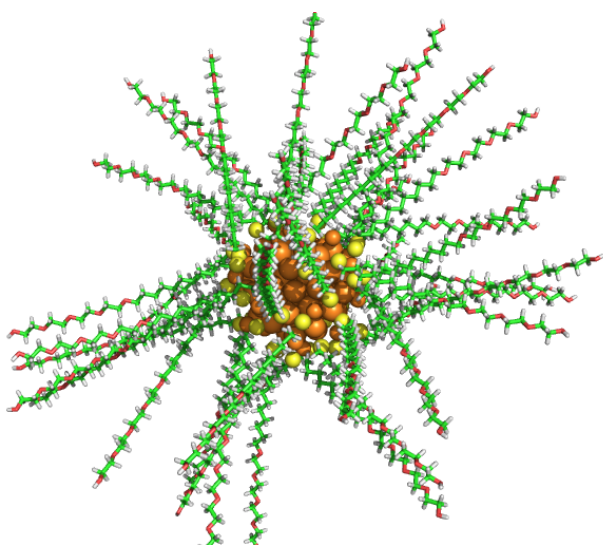

**Fig. S10**  $\text{Au}_{102}(\text{OEG})_{44}$ , (OEG =  $\text{HS}-(\text{CH}_2)_{11}\text{-EG-OH}$ )

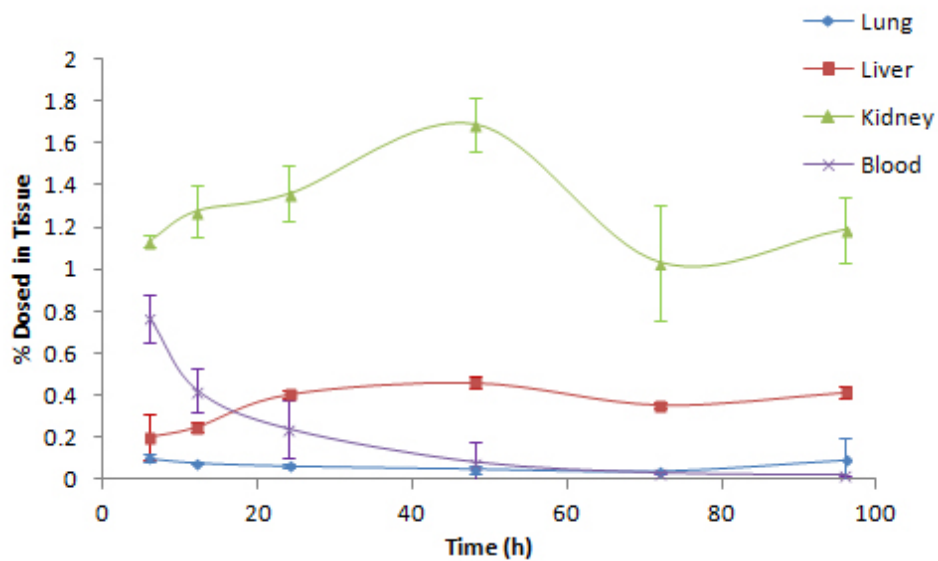

Fig. S11 Percent dosed in tissue for compound 1 at noted post-injection time points.

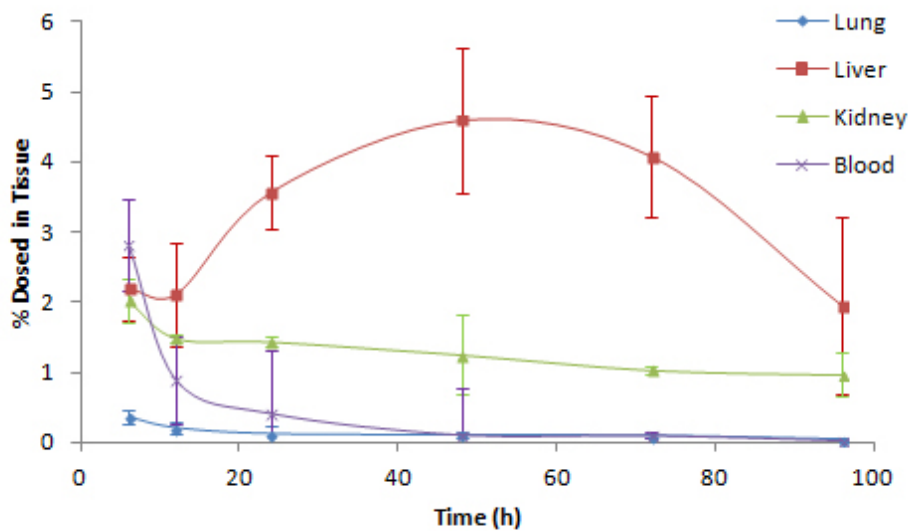

Fig. S12 Percent dosed in tissue for compound 2 at noted post-injection time points.

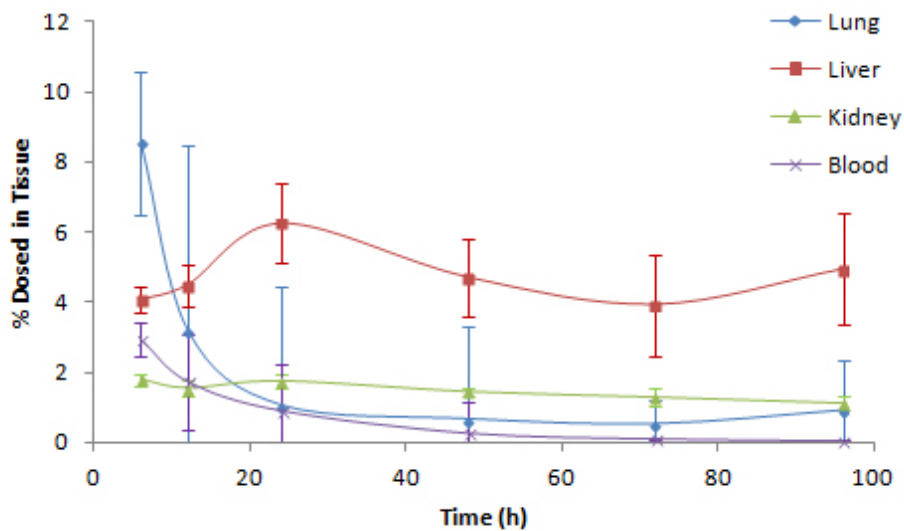

**Fig. S13** Percent dosed in tissue for compound **3** at noted post-injection time points.

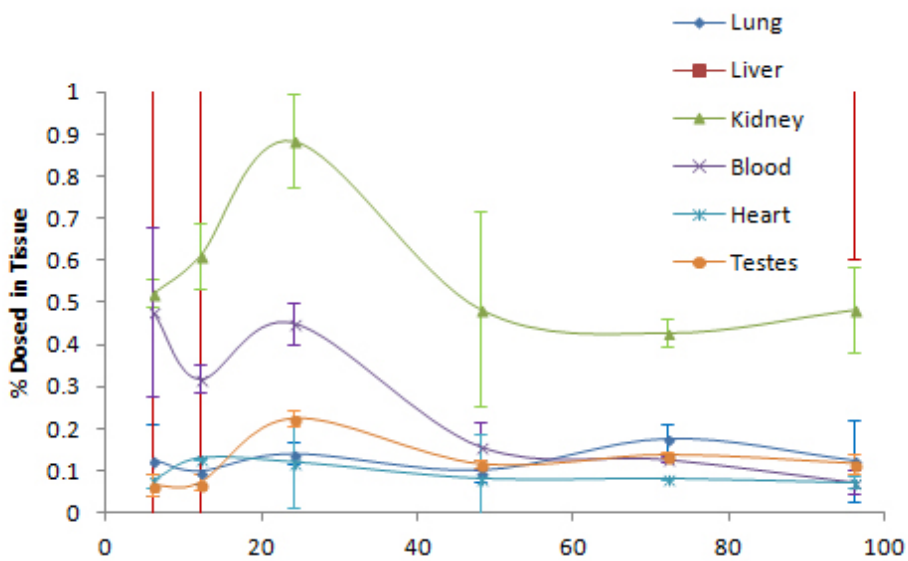

**Fig. S14** Percent dosed in tissue for compound **4** at noted post-injection time points. Data points of liver are not included.



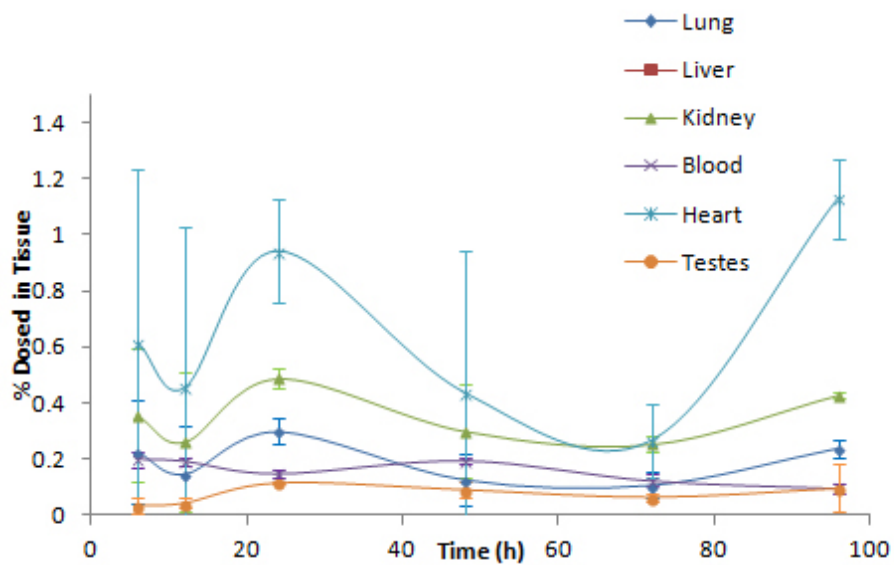

**Fig. S15** Percent dosed in tissue for compound **5** at noted post-injection time points. Data points of liver are not included.

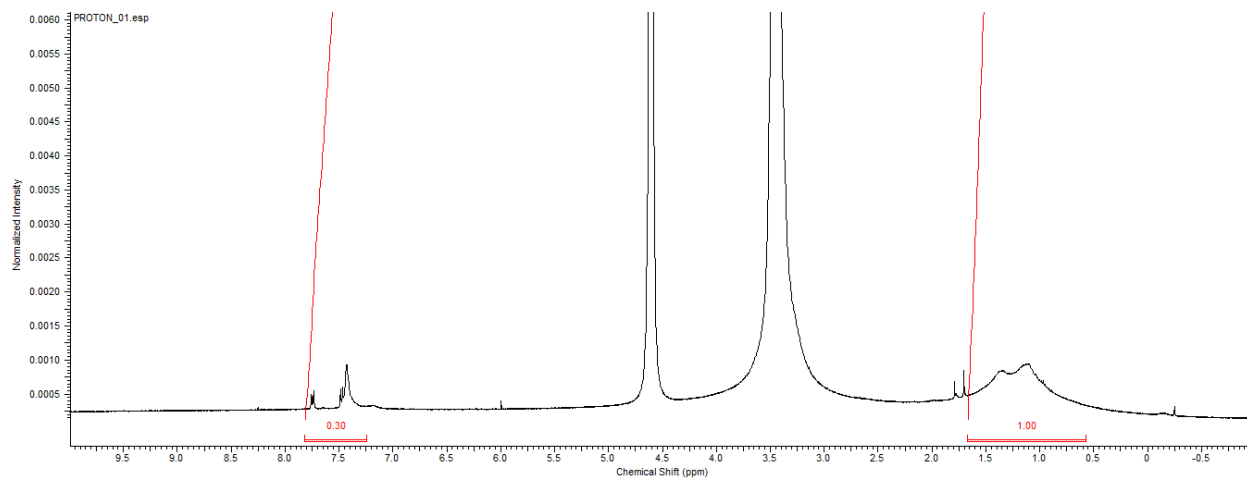

**Fig. S16** <sup>1</sup>H NMR of compound **5**

**Table S1** Information on Au<sub>102</sub>-based 1:1 exchanged compound

| Calculated Stokes Diameter (nm) <sup>a</sup> | Net Surface Charge (e <sup>-</sup> ) | Surface Charge Density (Charge/A <sup>2</sup> ) | Hydrophobic Surface Area (%) | Expected Clearance Mechanism % Renal / % RES |
|----------------------------------------------|--------------------------------------|-------------------------------------------------|------------------------------|----------------------------------------------|
| 5.92                                         | 22 <sup>-</sup>                      | 1.8×10 <sup>-4</sup> (-)                        | 74%                          | 40 / 60                                      |

**Ligand exchange reaction of Au<sub>102</sub>(pMBA)<sub>44</sub> with 23-mercapto-3,6,9,12-tetraoxatricosan-1-ol [HS-(CH<sub>2</sub>)<sub>11</sub>-EG<sub>4</sub>-OH]**

A 500 μM solution of Au<sub>102</sub>pMBA<sub>44</sub> (6.6 μmol, 178 mg in 13.37 mL H<sub>2</sub>O) and a 0.1 M solution of HS-(CH<sub>2</sub>)<sub>11</sub>-EG<sub>4</sub>-OH (0.79 mmol, 304 mg in 7.90 mL THF) were prepared. For the 1:1 incoming ligand:outgoing ligand reaction: 3 mL of Au<sub>102</sub>pMBA<sub>44</sub> solution and 0.66 mL of HS-(CH<sub>2</sub>)<sub>11</sub>-EG<sub>4</sub>-OH solution were mixed and diluted with H<sub>2</sub>O to a final volume of 15 mL. Then the reaction was shaken at rt for 1 h, then the crude product was purified by ultrafiltration spin columns (5000 Da cutoff) and was washed with 3 x 10 mL 1:1 H<sub>2</sub>O:MeOH. The remaining orange liquid was placed into a 15 mL conical and lyophilized until dry.

The Au<sub>102</sub>-based 1:1 exchanged compound was dissolved in 5% DMSO, 5% Tween-80 in 90% D5W solution. The particle solutions were filtered through a 0.45 micron filter, and the dosage concentrations were determined after the filtration step. Approximate dosage concentration for this compound was 3.14 x 10<sup>-5</sup> M.

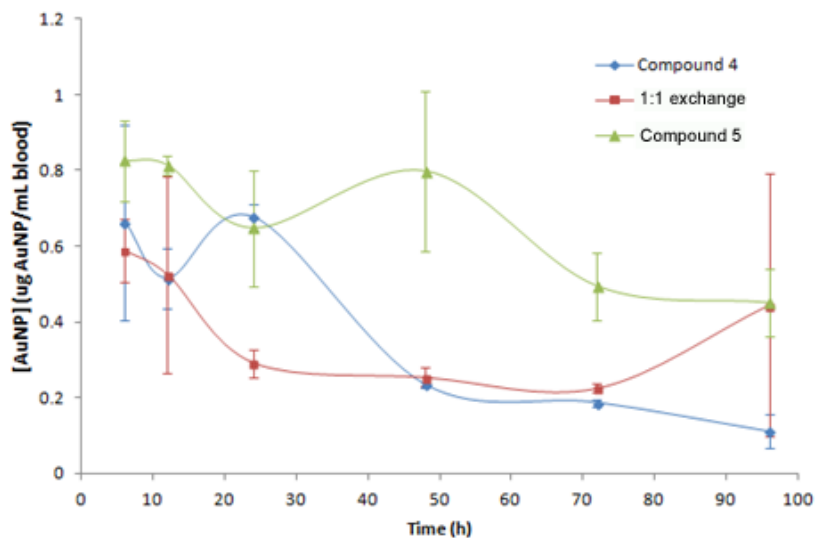

**Fig. S17** Blood drug concentration vs. time curves of Au<sub>102</sub>-based compounds
